# Supplementary material for: A reasonably constructed fluorescent chemosensor based on the dicyanoisophorone skeleton for the discriminative sensing of Fe3+ and Hg2+ as well as imaging in HeLa cells and zebrafish
Source: Royal Society of Chemistry journal article supplement (doi:10.1039/d2ra01357f), 2022-01-01
Supplement: d2ra01357f1.pdf [file d2ra01357f1.pdf]

Supporting Information of

## Reasonably constructed fluorescent chemosensor based on dicyanoisophorone skeleton for discriminative sensing Fe<sup>3+</sup> and Hg<sup>2+</sup> as well as imaging in Hela cells and zebrafish

Chuqi Zhang<sup>a</sup>, Xinyan Lv<sup>a</sup>, Xiuhong Liu<sup>a\*</sup>, Hongyun Chen<sup>a\*</sup>, Haifeng He<sup>a</sup>

<sup>a</sup>School of Chemistry and Chemical Engineering, Jiangxi Science and Technology Normal University, Nanchang 330013, People's Republic of China

\* Corresponding author E-mail: xiuhong0627@163.com; chenhongyun92@126.com

### S1. General information

Unless stated otherwise, all analytical grad chemicals and solvents used in this paper were purchased from commercial vendors. The salts used in stock solutions of metal ions were Na<sub>2</sub>SO<sub>4</sub>, KNO<sub>3</sub>, AgNO<sub>3</sub>, Pb(NO<sub>3</sub>)<sub>2</sub>, CoSO<sub>4</sub>·7H<sub>2</sub>O, ZnSO<sub>4</sub>·7H<sub>2</sub>O, MgSO<sub>4</sub>, NiSO<sub>4</sub>·6H<sub>2</sub>O, CuSO<sub>4</sub>·5H<sub>2</sub>O, FeSO<sub>4</sub>·7H<sub>2</sub>O, MnSO<sub>4</sub>·2H<sub>2</sub>O, Cr(NO<sub>3</sub>)<sub>3</sub>·9H<sub>2</sub>O, Al(NO<sub>3</sub>)<sub>3</sub>·9H<sub>2</sub>O, Fe(NO<sub>3</sub>)<sub>3</sub>·9H<sub>2</sub>O and Hg(ClO<sub>4</sub>)<sub>2</sub>·3H<sub>2</sub>O. The <sup>1</sup>H and <sup>13</sup>C NMR spectra were collected on a Bruker AV-400(400 MHz) in a DMSO-*d*<sub>6</sub> solution with TMS as the internal standard. Fluorescence spectra was determined by a Hitachi F-4600 fluorescence spectrophotometer.

### S2. Synthesis of compounds

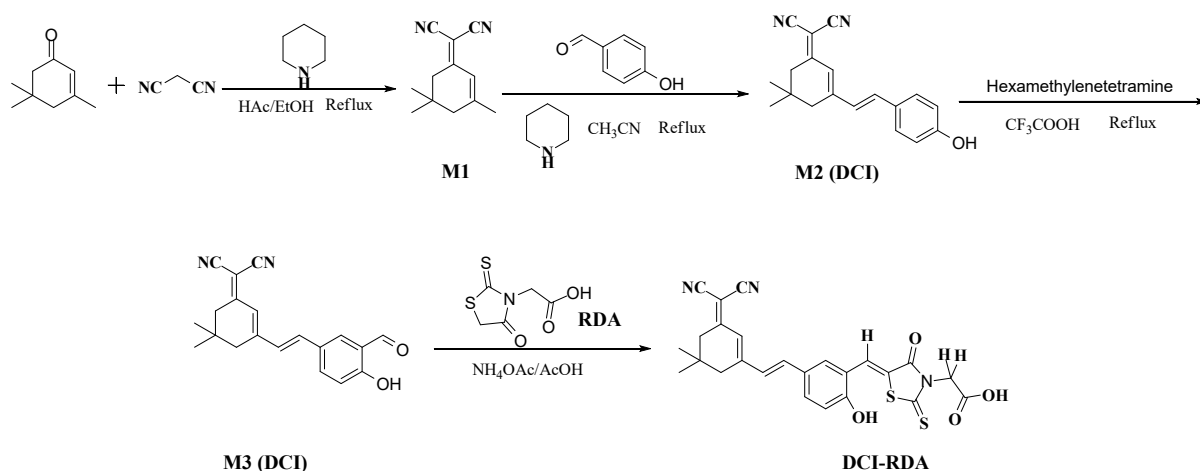

Scheme S1. The synthetic pathways of probe DCI-RDA

#### S 2.1. Synthesis of compound 2-(3,5,5-trimethylcyclohex-2-en-1-ylidene)malononitrile (M1)

Isophorone (4.14 g, 30 mmol), malononitrile (2.64 g, 40.0 mmol), piperidine (0.4 mL, 4.0 mmol) and glacial acetic acid (0.24 g, 4 mmol) were dissolved in 80 mL EtOH. Then, the mixture was refluxed for 8 h under argon atmosphere. After the solvent was removed, the residue was dissolved with CH<sub>2</sub>Cl<sub>2</sub>, washed with water, and dried over Na<sub>2</sub>SO<sub>4</sub>. Finally, the solvent was evaporated under reduced pressure, and the crude product was purified by silica column chromatography (PE/EA = 1:8, v/v) to give a white solid (4.3 g, 77.1%). <sup>1</sup>H NMR (400 MHz, DMSO-*d*<sub>6</sub>): δ 6.56 (d, *J* = 1.3 Hz, 1H), 2.53 (s, 2H), 2.23 (s, 2H), 2.05 (s, 3H), 0.95 (s, 6H). <sup>13</sup>C NMR (100 MHz, DMSO-*d*<sub>6</sub>): 171.3, 162.4, 119.4, 113.4, 112.6, 76.1, 44.7, 41.7, 31.9, 27.1, 25.0.

### S 2.2 Synthesis of compound 2-(3-(4-hydroxystyryl)-5,5-dimethylcyclohex-2-en-1-ylidene)malononitrile (M2)

**M1** (1.86 g, 10 mmol), p-hydroxybenzaldehyde (1.46 g, 12 mmol), five drops of piperidine were dissolved in 30 mL anhydrous acetonitrile. The mixture was refluxed for 5 h under argon atmosphere. Subsequently, the solvent was removed under reduced pressure. The resulting residue was dissolved in 20 mL dichloromethane, washed with water for three times, and dried over anhydrous Na<sub>2</sub>SO<sub>4</sub>. After the removal of the solvent, the crude product was purified by silica column chromatography (PE) to afford the **M2** as a red solid (2.42 g, 83.4%). <sup>1</sup>H NMR (400 MHz, DMSO-*d*<sub>6</sub>): δ 10.00 (s, 1H), 7.56 (d, *J* = 8.7 Hz, 2H), 7.35~7.12 (m, 2H), 6.80~6.79 (m, 3H), 2.60 (s, 2H), 2.52 (s, 2H), 1.01 (s, 6H). <sup>13</sup>C NMR (100 MHz, DMSO-*d*<sub>6</sub>): δ 170.2, 159.3, 156.7, 138.3, 129.9, 127.2, 126.1, 121.3, 115.8, 114.2, 113.4, 74.9, 42.3, 38.19, 3.62, 27.3.

### S 2.3 Synthesis of compound 2-(3-(3-formyl-4-hydroxystyryl)-5,5-dimethylcyclohex-2-en-1-ylidene)malononitrile (M3)

Hexamethylenetetramine (0.50 g, 3.6 mmol) was added to solution of **M2** (0.87 g, 3 mmol) in trifluoroacetic acid (20 mL). The mixture was refluxed for 5 h. After complete reaction, the solvent was evaporated under a rotary evaporator, diluted with water and then neutralized with NaOH until the pH reached 7.0. Subsequently, the solution was extracted with dichloromethane. The organic layer was washed with water for three times, dried over anhydrous sodium sulfate. The crude product was purified by silica gel column chromatography with dichloromethane as the eluent to afford **M3** as a yellow solid

(0.45g, 47.2%). <sup>1</sup>H NMR (400 MHz, DMSO-*d*<sub>6</sub>): δ 11.32 (s, 1H), 10.31 (s, 1H), 7.98 (d, *J* = 2.2 Hz, 1H), 7.89 (dd, *J* = 8.9, 2.4 Hz, 1H), 7.31 ~ 7.25 (m, 2H), 7.10 (d, *J* = 8.9 Hz, 1H), 6.89 (s, 1H), 2.60 (s, 2H), 2.52 (s, 2H), 1.01 (s, 6H). <sup>13</sup>C NMR (100 MHz, DMSO-*d*<sub>6</sub>): δ 190.7, 170.4, 161.9, 156.2, 136.9, 134.8, 128.8, 127.8, 127.7, 122.7, 122.2, 118.2, 113.9, 113.3, 75.6, 42.4, 38.2, 31.7, 27.4.

### S2.3 Synthesis of probe DCI-RAD

Compound **M3** (343.4 mg, 1.08 mmol) and rhodanine-3-acetic acid (203.3mg, 1.07 mmol) were added into the acetic acid (25 mL) in the presence of ammonium acetate (83mg) under nitrogen atmosphere. The mixture was stirred 24h at 100 °C. After the mixture cooled to room temperature, the reaction was quenched using ice water. The precipitate was filtered and washed thoroughly with water. The solvent was then evaporated, and the product was purified by column chromatography on silica with petroleum ether/ethyl acetate (1/1 in v/v) as the eluent. The solvent was evaporated, and probe DCI-RAD was obtained. <sup>1</sup>H NMR (400 MHz, DMSO-*d*<sub>6</sub>) δ (ppm) 13.33 (s, 1H), 11.46 (s, 1H), 7.98 (s, 1H), 7.80 (d, *J*=8.5 Hz, 1H), 7.60 (s, 1H), 7.28 (dd, *J*=41.9, 16.1 Hz, 2H), 7.02 (d, *J*=8.6 Hz, 1H), 6.83 (s, 1H), 4.74 (s, 2H), 2.59 (s, 2H), 2.55 (s, 2H), 1.03 (s, 6H); <sup>13</sup>C NMR (100 MHz, DMSO-*d*<sub>6</sub>) δ=194.2, 170.6, 167.7, 167.0, 159.4, 156.6, 137.4, 132.4, 130.8, 129.6, 128.7, 128.3, 122.6, 121.7, 120.7, 117.5, 114.4, 113.6, 76.1, 45.4, 42.8, 38.7, 32.1, 27.9; HRMS(M+Na-H): *m/z* = 513.0792.

## S3. Calculations

### S3.1 Determination of Detection Limit

The detection limit was calculated based on fluorescence titration as a function the solubility of Hg<sup>2+</sup>/Fe<sup>3+</sup> at λ<sub>em</sub> 622 nm. The fluorescence emission spectrum of free probe DCI-RAD was measured over 3 times to determine standard deviation for blank measurement. A linear plot was constructed with average values of the intensities against the concentration of Hg<sup>2+</sup>/Fe<sup>3+</sup> ions for determining the slope. Using the slope the detection limit was calculated from the following equation. [Dalton Trans. 2014, 43, 1881-1887; Analyst, 2017, 142, 2067-2089. Anal. Chem. 1996, 68, 1414-1418.]

$$LOD = \frac{3\sigma}{K}$$

Where,  $\sigma$  is the standard deviation of the blank solution and  $K$  is the slope between intensity versus sample concentration.

### S3.2 Determination of Binding Constant

The binding constant of the DCI-RAD +  $\text{Hg}^{2+}/\text{Fe}^{3+}$  complex formed in solution has been determined by using the standard Benesi-Hildebrand (B-H) equation. [Anal. Chem. 1996, 68, 1414-1418.]

$$\frac{1}{F - F_o} = \frac{1}{K_a(F_{max} - F_o) [M]} + \frac{1}{F_{max} - F_o}$$

Where,  $F_o$  is the fluorescence intensity of free probe DCI-RAD,  $F$  is the observed fluorescence intensity at any given concentration of  $\text{Hg}^{2+}/\text{Fe}^{3+}$ ,  $F_{max}$  is the intensity at saturation point with the  $\text{Hg}^{2+}/\text{Fe}^{3+}$ ,  $K_a$  is the association constant and  $[\text{Hg}^{2+}/\text{Fe}^{3+}]$  is the concentration of the  $\text{Hg}^{2+}/\text{Fe}^{3+}$  ions in micromolar.

### S3.3 Determination of Stoichiometry by Continuous Variation Plot (Job's plot) Measurement

The stoichiometric binding ratio of probe DCI-RAD and  $\text{Fe}^{3+}/\text{Hg}^{2+}$  ion was confirmed by continuous variation emission analysis at  $\lambda_{em}$  622 nm, the resulting data was plotted as change in fluorescence intensity, emission intensity in the vertical axis against the mole fraction,  $X_M$  of  $\text{Hg}^{2+}/\text{Fe}^{3+}$  ions in the horizontal axis. [Anal. Chem. 1996, 68, 1414-1418.]

## S4. Cell Cultures and Imaging

Hela cultured in Dulbecco's modified Eagle's medium (DMEM) supplemented with 10% fetal bovine serum and penicillin-streptomycin ( $0.5 \text{U} \cdot \text{mL}^{-1}$  of penicillin and  $0.5 \text{g} \cdot \text{mL}^{-1}$  streptomycin) on a cell culture flask at  $37^\circ\text{C}$  in an atmosphere of air with 5%  $\text{CO}_2$  and constant humidity. Each cell line was seeded in a 6-well plate for 24 h. The cells were initially incubated with DCI-RAD ( $10 \mu\text{M}$ ) in culture medium for 30 min at  $37^\circ\text{C}$ . After washing three times with PBS to remove the remaining DCI-RAD, the Hela cells were incubated in the absence and presence of  $\text{Hg}^{2+}/\text{Fe}^{3+}$  ( $100 \mu\text{M}$ ) in culture medium for another 30 min at  $37^\circ\text{C}$ . The imaging was carried out using inverted fluorescence microscopy (Olympus IX71, Japan).

## S5. Imaging of Zebrafish

The 3-7 days old zebrafishes post-fertilization were purchased from Eze-Rinka Company (Nanjing, China). The zebrafishes were cultured in 5 mL of embryo medium supplemented with 1-phenyl-2-thiourea

(PTU) in 6-well plates for 24 h at 30 °C. Zebrafishes were divided into three groups and both incubated with **DCI-RAD** (10  $\mu$ M) for 1 h. After washing three times to remove the remaining **DCI-RAD**, one group as control group and the others group further treated with  $\text{Hg}^{2+}$  and  $\text{Fe}^{3+}$  (100  $\mu$ M) for another 1 h, respectively. The fluorescence images were acquired with stereo microscopy (Olympus SZX16, Japan).

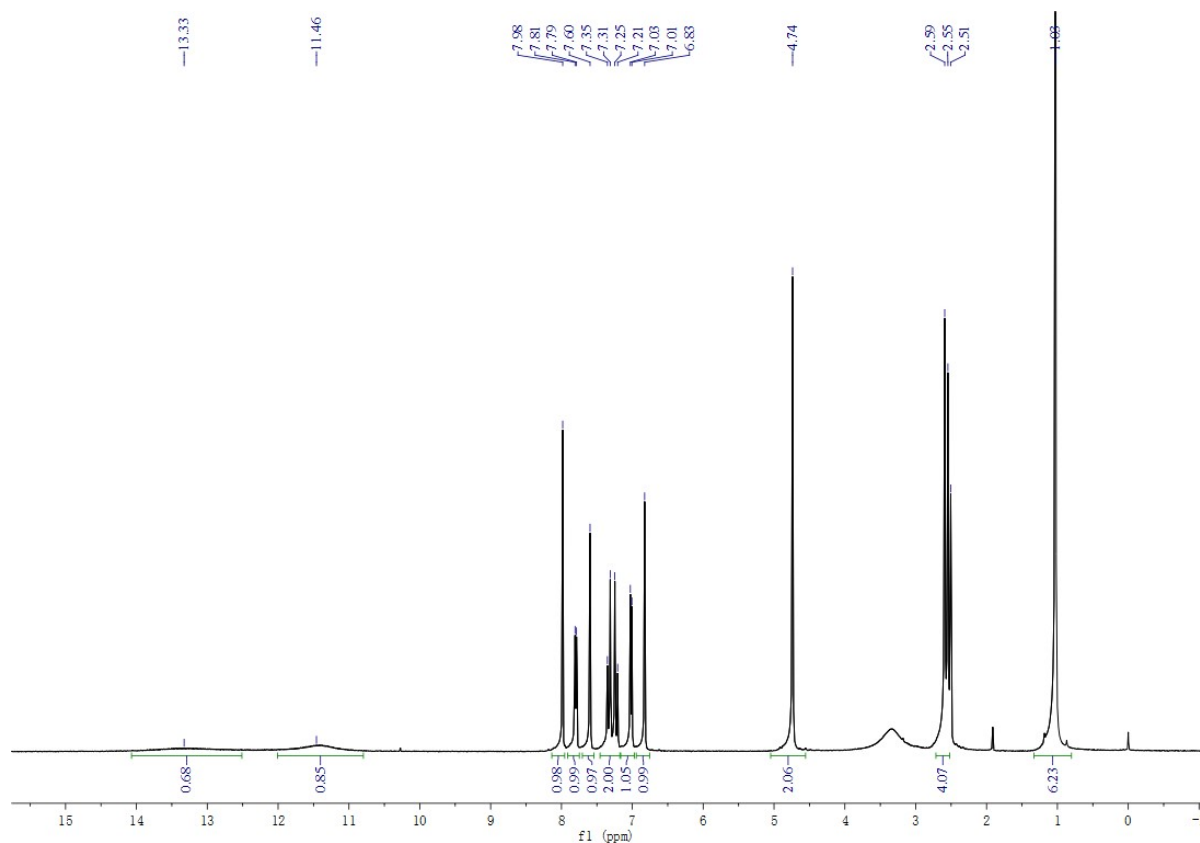

**Figure S1.**  $^1\text{H}$  NMR Spectrum of probe DCI-RAD in  $\text{DMSO-}d_6$

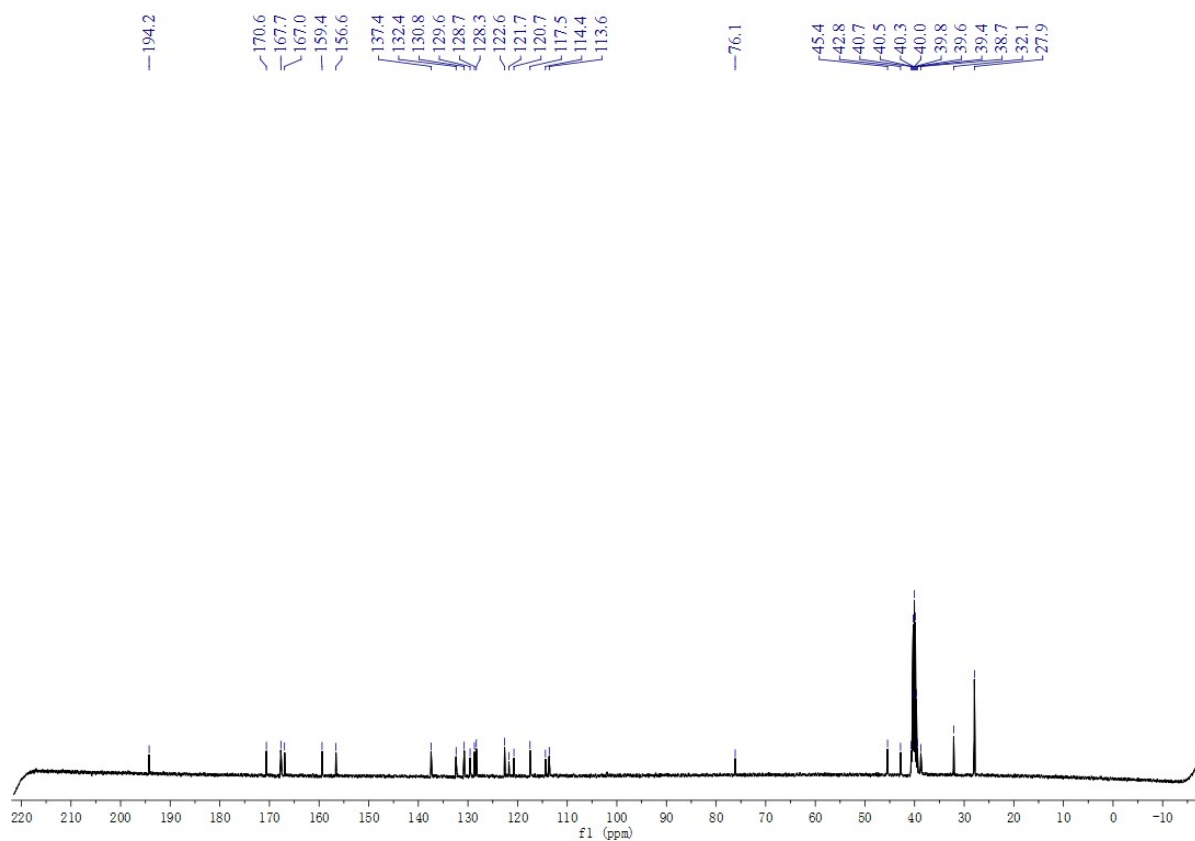

Figure S2.  $^{13}\text{C}$  NMR Spectrum of probe DCI-RAD in  $\text{DMSO-}d_6$

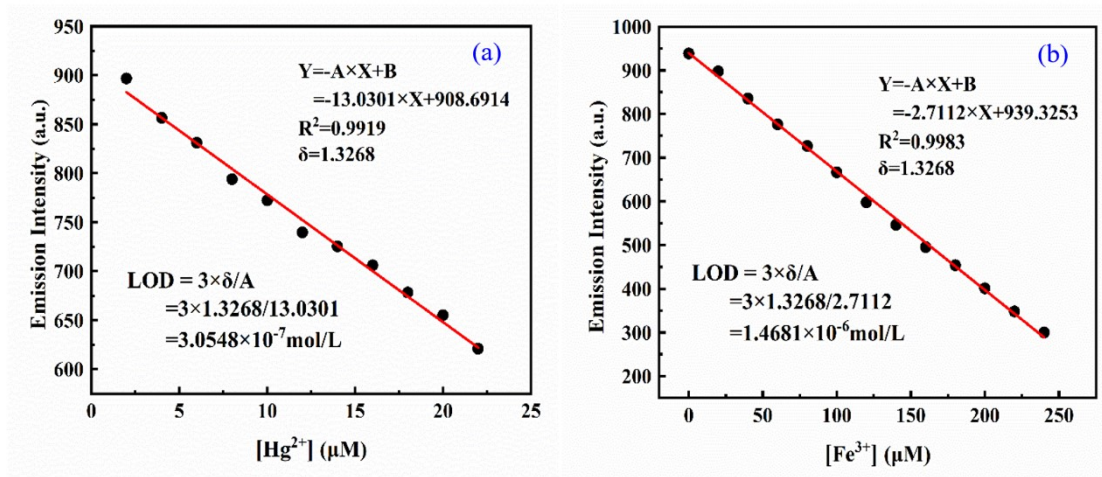

Figure S3. The LOD of DCI-RDA against  $\text{Hg}^{2+}$ (A) and  $\text{Fe}^{3+}$  (B).

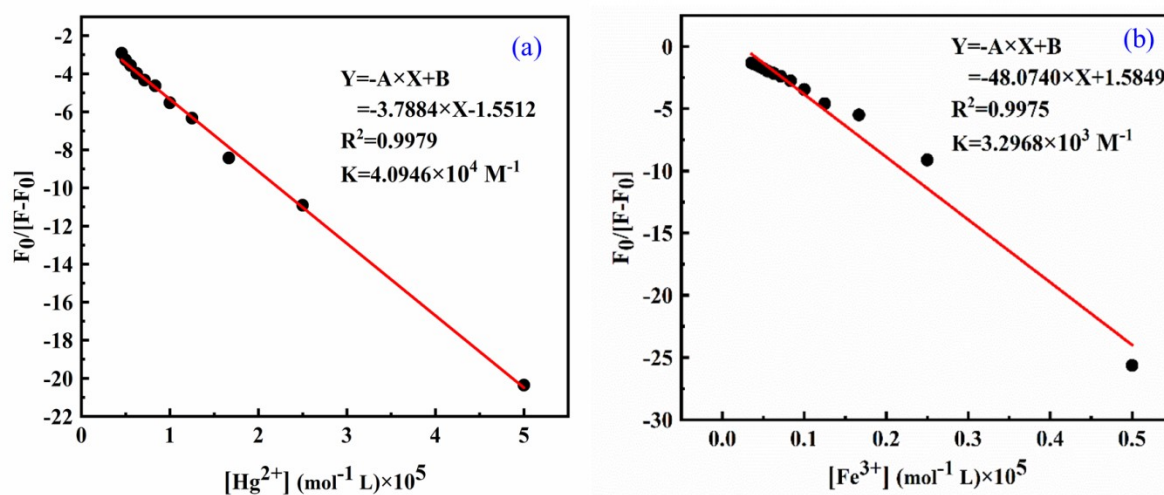

**Figure S4.** The association constant ( $K_a$ ) of DCI-RDA combined with  $\text{Hg}^{2+}$  (A) and  $\text{Fe}^{3+}$  (B).

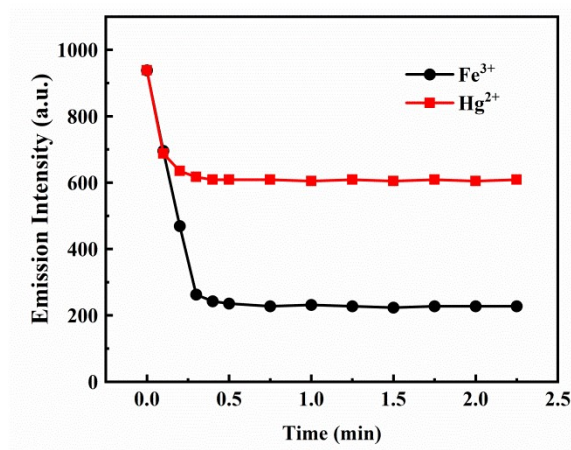

**Figure S5.** Effect of response time on the fluorescence intensity of DCI-RDA (20  $\mu\text{M}$ )

**Table S1** The chemical shift changes on values of change before and after

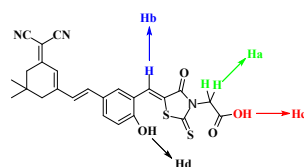

| Proton chemical shift (ppm) | Ha   | Hb   | Hc    | Hd        | CH <sub>3</sub> | CH <sub>2</sub> | =CH  | HC=CH | Ph               |
|-----------------------------|------|------|-------|-----------|-----------------|-----------------|------|-------|------------------|
| Free DCI-RDA                | 4.74 | 7.98 | 13.33 | 11.4<br>6 | 1.03            | 2.55            | 7.60 | 7.28  | 7.80, 7.02, 6.83 |

|                          |      |      |              |           |      |      |      |      |                |
|--------------------------|------|------|--------------|-----------|------|------|------|------|----------------|
| DCI-RDA-Hg <sup>2+</sup> | 4.38 | 8.10 | disappearing | 11.4<br>5 | 1.03 | 2.55 | 7.60 | 7.28 | 7.80,7.02,6.83 |
|--------------------------|------|------|--------------|-----------|------|------|------|------|----------------|

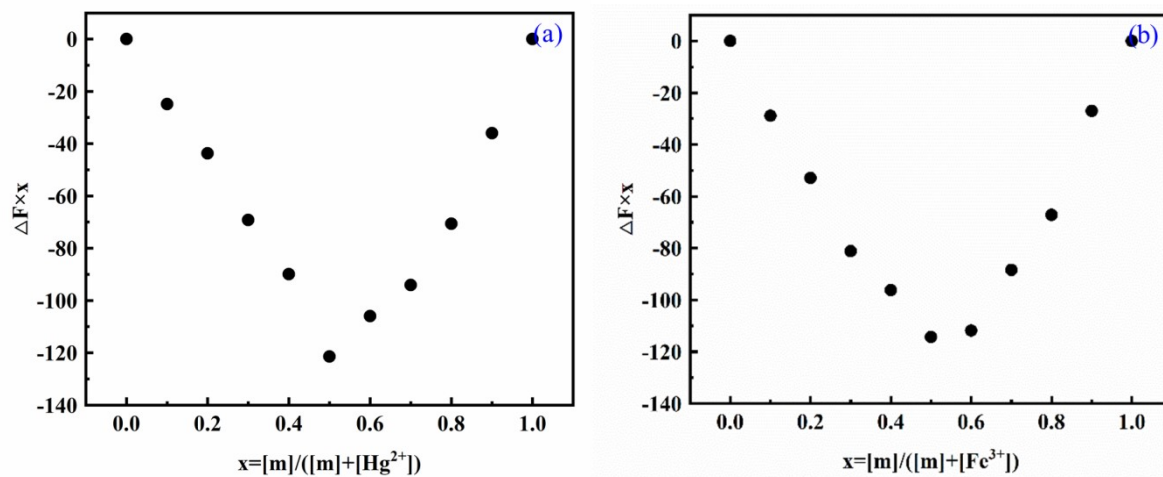

**Figure S6** Job's plot for the complex of DCI-RDA with Hg<sup>2+</sup>(A) or Fe<sup>3+</sup> (B)

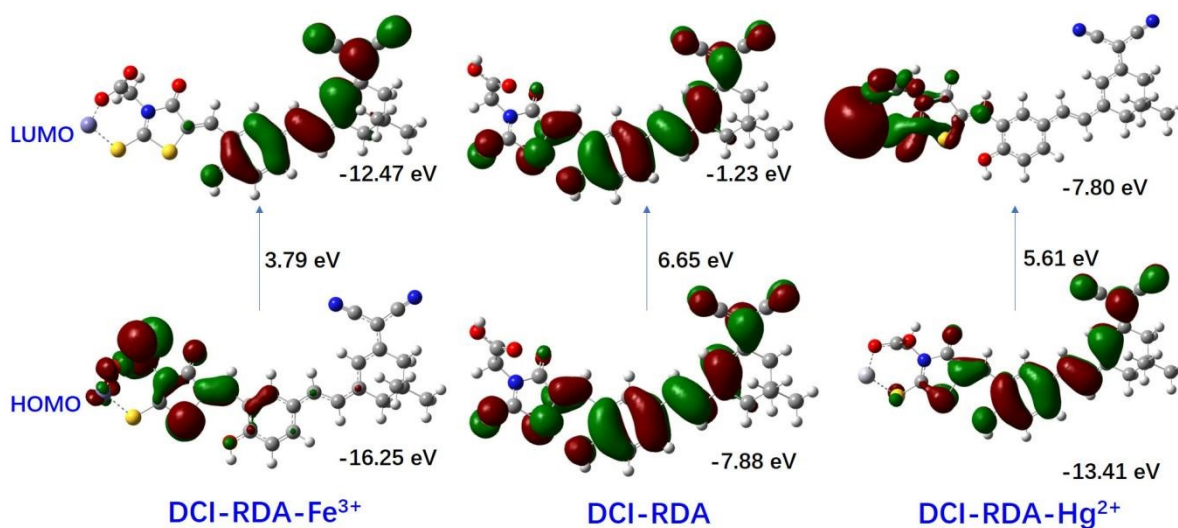

**Figure S7.** HOMO–LUMO energy diagrams of DCI-RDA with Fe<sup>3+</sup>/Hg<sup>2+</sup>.



Table S2 Comparison on detection limits of reported fluorescent sensor for Hg<sup>2+</sup> ion.

| Probes                                                                              | $\lambda_{em}$<br>(nm) | $\lambda_{ex}$<br>(nm) | Stocks<br>shift(n<br>m) | LOD                     | Cell<br>imag<br>ing | Zebrafish<br>experime<br>nt | References<br>in main<br>manuscript                               |
|-------------------------------------------------------------------------------------|------------------------|------------------------|-------------------------|-------------------------|---------------------|-----------------------------|-------------------------------------------------------------------|
| 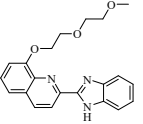   | 475                    | 348                    | 127                     | $2.54 \times 10^{-7}$ M | No                  | No                          | RSC..<br>Advances.,<br>4(2014)16<br>612.                          |
|    | 427                    | 347                    | 80                      | $2.82 \times 10^{-6}$ M | Yes                 | No                          | New. J.<br>Chem.,<br>39(2015)<br>2523                             |
|   | 538                    | 395                    | 143                     | $4.16 \times 10^{-6}$ M | No                  | No                          | RSC.<br>Adv., 9<br>(2019)<br>23316                                |
|  | 500/<br>570            | 365                    |                         | 7nM                     | No                  | No                          | Dyes.<br>Pigments.<br>191 (2021)<br>109374                        |
|  | 502                    | 477                    | 25                      | 10nM                    | Yes                 | No                          | Chinese<br>Chem.<br>Lett., 05<br>(2021)<br>047.                   |
|  | 480                    | 346                    | 134                     | $2.05 \times 10^{-7}$ M | No                  | No                          | J.<br>Photoche<br>m.<br>Photobio.<br>A., 416<br>(2021)<br>113322. |
|  | 575                    | 450                    | 125                     | $3.5 \times 10^{-8}$ M  | Yes                 | No                          | RSC. Adv.<br>6 (2016)<br>7668.                                    |
|  | 538                    | 360                    | 178                     | 5nM                     | No                  | No                          | Chem.<br>Commun.<br>2008,<br>1413-1415                            |

|  |     |     |     |                           |     |     |                                    |
|--|-----|-----|-----|---------------------------|-----|-----|------------------------------------|
|  | 582 | 515 | 67  | 1.71 μM                   | No  | No  | Dyes and Pigments. 159 (2018)121   |
|  | 604 | 560 | 44  | 17 nM                     | No  | No  | Luminescence. 33 (2018)1122        |
|  | 592 | 355 | 237 | 43 pM                     | No  | No  | Analyst. 144 (2019) 1353           |
|  | 625 | 475 | 150 | 7.1 nM                    | Yes | Yes | Org. Biomol. Chem., 16 (2018) 5036 |
|  | 659 | 514 | 145 | 68 nM                     | Yes | No  | Dyes Pigm. 163 (2019) 118          |
|  | 750 | 650 | 100 | 2.51 μM                   | No  | No  | Dyes Pigm. 103 (2014) 145          |
|  | 746 | 670 | 76  | 1.91 × 10 <sup>-7</sup> M | No  | No  | New. J. Chem. 41 (2017) 13495      |
|  | 661 | 500 | 161 | 9.95 nM                   | Yes | No  | Dyes Pigm. 160 (2019) 86           |

|                                                                                     |                 |     |     |          |     |     |                                    |
|-------------------------------------------------------------------------------------|-----------------|-----|-----|----------|-----|-----|------------------------------------|
| 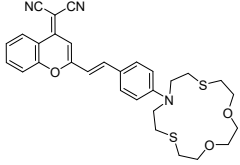   | 645             | 517 | 128 | 0.14 μM  | Yes | Yes | Dyes. Pigm. 172 (2020) 107658.     |
|    | 364<br>,<br>464 | 285 | 79  | 4.71 nM  | No  | No  | Polym Chem. 11 (2020) 2015         |
|    | 529             | 319 | 210 | 2.4 μM   | Yes | Yes | Bioanal. Chem. 412 (2020) 881      |
|   | 615             | 470 | 145 | 0.22 μM  | Yes | Yes |                                    |
|  | 618             | 470 | 148 | 2.86 μM  | Yes | No  |                                    |
|  | 657             | 480 | 177 | 13.1 nM  | Yes | Yes | Org. Biomol. Chem., 32 (2020) 6357 |
|  | 460             | 622 | 162 | 0.305 μM | Yes | Yes | This Work                          |
